# Supplementary material
Source: PubMed Central journal article supplement (PMC6460638)
Supplement: 41431_2018_328_MOESM4_ESM.pdf [file 41431_2018_328_MOESM4_ESM.pdf]

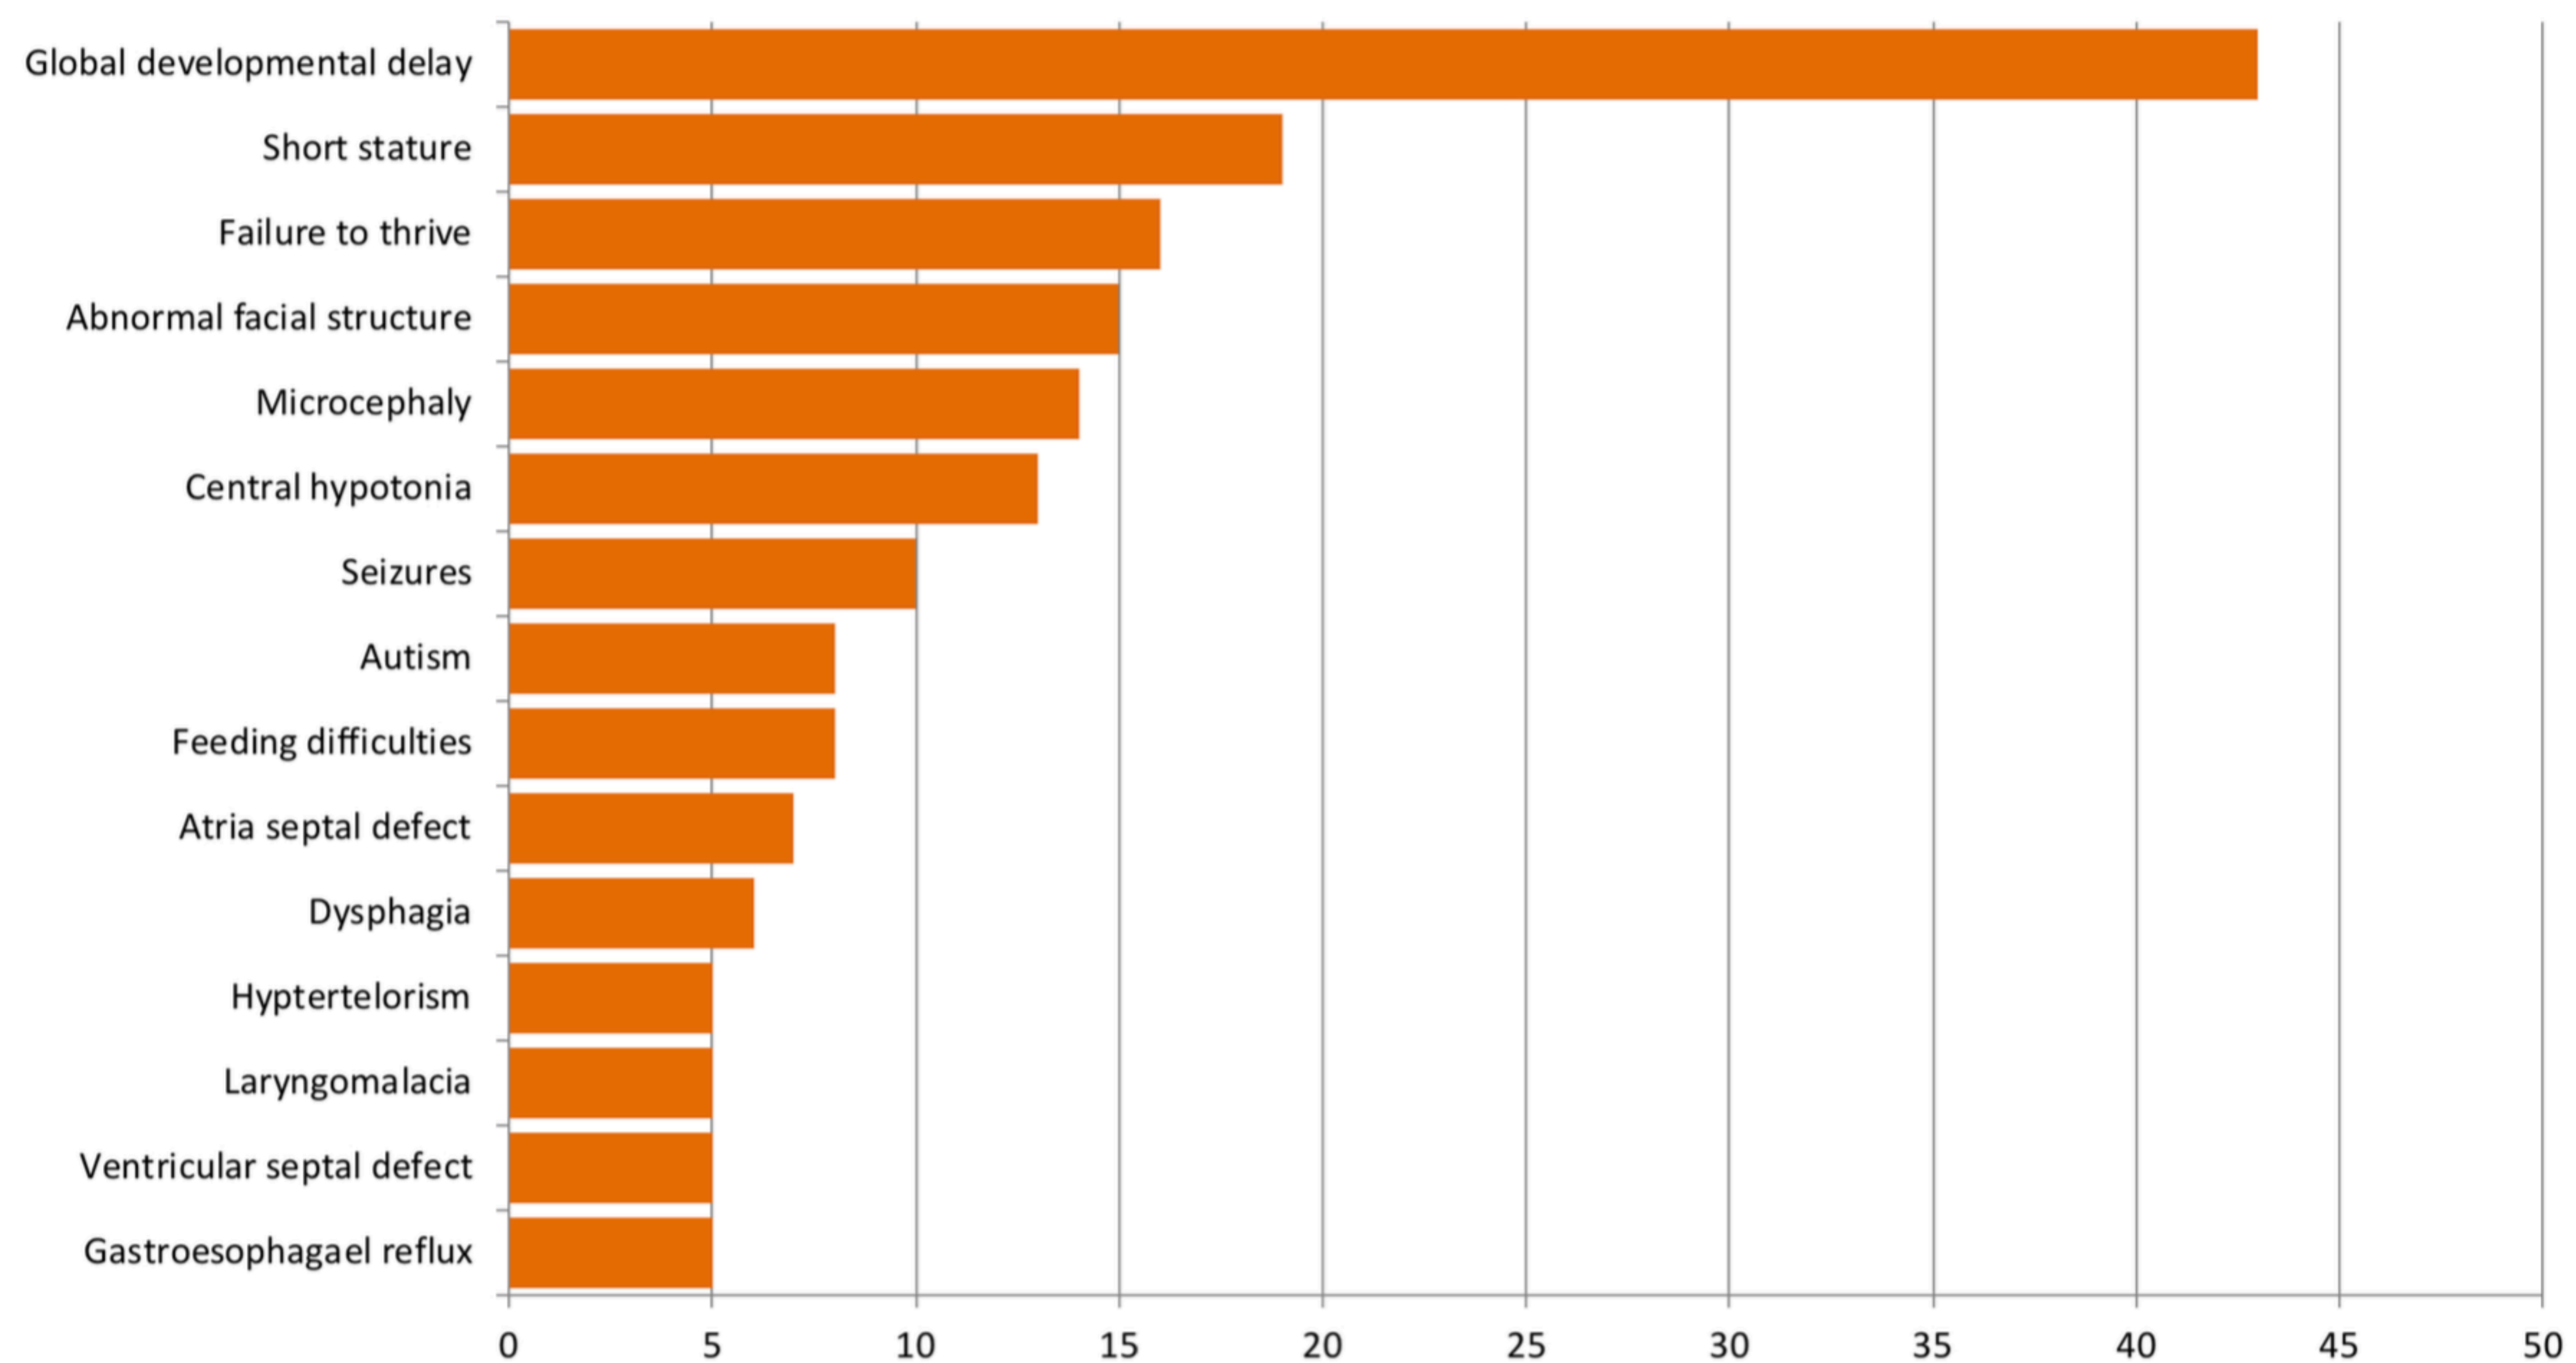

**Figure S3. Fifteen Most Frequent HPO Terms of Clinical Cohort**

Global Developmental Delay was observed on 43 patients while each of the rest terms was used to describe at least five different patients in the cohort.
