# Supplementary material
Source: PubMed Central journal article supplement (PMC6460638)
Supplement: 41431_2018_328_MOESM5_ESM.pdf [file 41431_2018_328_MOESM5_ESM.pdf]

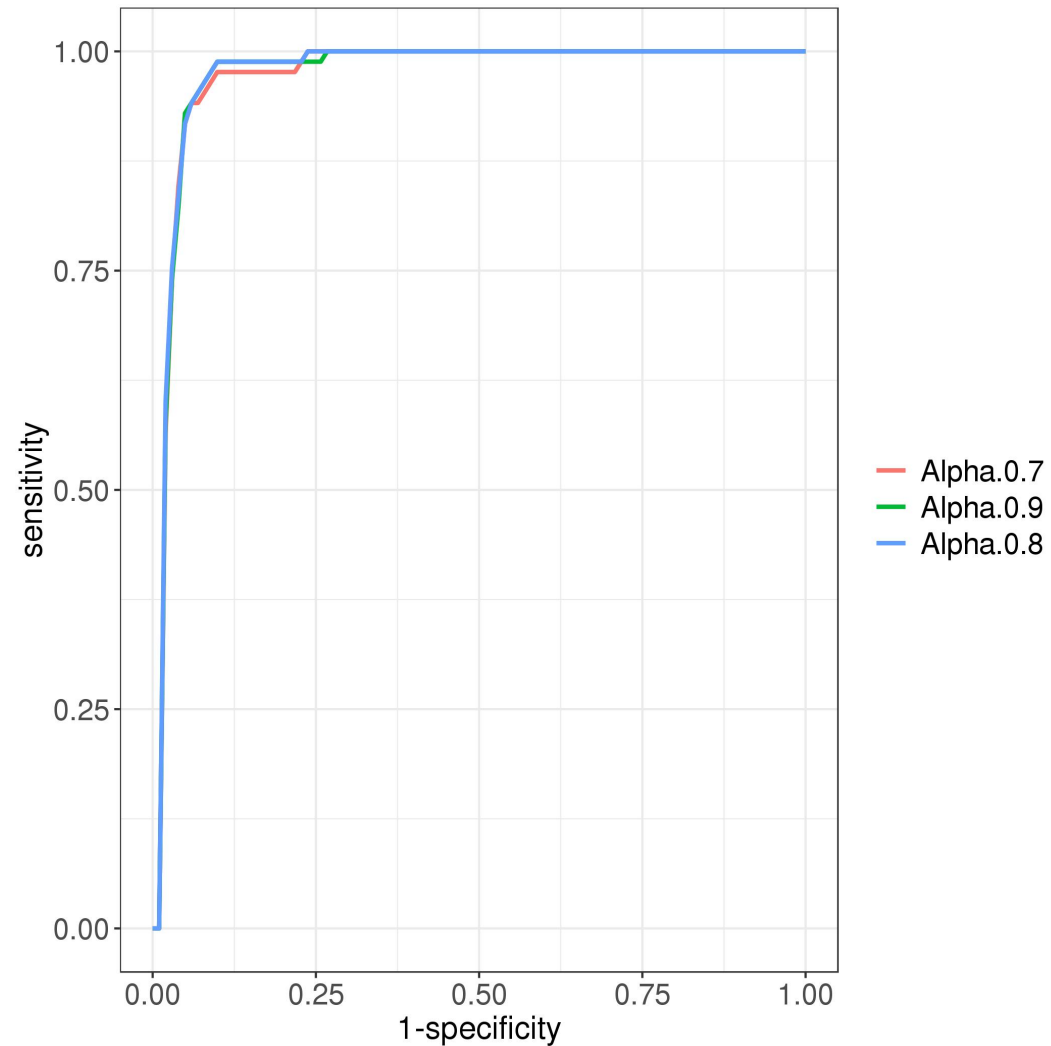

**Figure S4. Phenoxome ROC Curves of Different  $\alpha$  Values Based on Pathogenic Variant Ranks**

The ROC curves were generated using clinical samples in the study. Sensitivity was defined as the frequency of pathogenic variants that were ranked above a particular threshold position, and specificity as the percentage of pathogenic variants ranked below the threshold. The AUC scores for  $\alpha=0.7$ , 0.8 and 0.9 are 0.981, 0.984 and 0.982 respectively.
